# Supplementary material for: Investigation of the Species Distribution of Tissue Invasive Klebsiella Pneumoniae Complex in A New York Hospital System Using Whole Genome Sequencing
Source: Research Square preprint supplement (doi:10.21203/rs.3.rs-151961/v1), 2021-02-03
Supplement: Supplementary file 1 [file 770dbe5d4e84ea91193419e7.xls]

## Sheet: Sheet1
Investigation of the Species Distribution of Tissue Invasive Klebsiella pneumoniae Complex in a New York Hospital System Using Whole Genome Sequencing
Running Title: Klebsiella pneumoniae Complex Species
Jessica L. Bohrhunter a , Samantha Taffner a , Jun Wang a , Dwight J. Hardy a, b , Nicole D. Pecora a, b
a Department of Pathology, University of Rochester Medical Center, Rochester, New York, United States of America
b Department of Microbiology and Immunology, University of Rochester, Rochester, New York, United States of America
Correspondence should be directed to Nicole Pecora at Nicole_Pecora@URMC.Rochester.edu

## Sheet: Additional File 2
Additional File 2: SNP Matrix for Klebsiella pneumoniae sensu stricto Isolates in the October 2018 – October 2019 Collection
	URMC_473	URMC_475	URMC_482	URMC_483	URMC_484	URMC_485	URMC_487	URMC_488	URMC_545	URMC_546	URMC_547	URMC_548	URMC_549	URMC_550	URMC_551	URMC_552	URMC_554	URMC_556	URMC_557	URMC_559	URMC_561	URMC_562	URMC_563	URMC_564	URMC_565	URMC_566	URMC_567	URMC_569	URMC_570	URMC_571	URMC_572	URMC_573
URMC_473		29965	32702	29684	31757	32335	33461	3484	34625	32167	33339	32609	31069	33540	31728	30137	33019	32658	30509	12917	33250	30996	34436	31286	33485	32450	33036	30519	29885	7464	29223	31303
URMC_475	29965		30659	30008	31361	30927	31787	29646	32002	30933	30625	30417	30155	31358	30410	29217	30827	31185	29513	29856	30596	30064	31701	30607	32122	30389	31249	29525	28219	29687	28972	31464
URMC_482	32702	30659		32448	32021	31134	31484	32812	33093	31662	30821	30965	30110	32042	29612	28593	30679	32259	28956	31800	30782	32463	32279	30472	32004	30221	31722	31379	30613	33229	31126	31221
URMC_483	29684	30008	32448		31885	32081	32883	29573	34311	32956	32980	32037	31292	33904	31500	30510	33167	33061	30387	29806	32884	30826	33590	31284	33364	32762	32930	30508	29639	31523	29857	31945
URMC_484	31757	31361	32021	31885		31742	32242	31667	32452	30471	31388	32011	29847	31839	30881	29203	31677	30196	29721	32578	31315	32214	32935	28864	32861	31550	31733	31244	31308	34208	31639	30090
URMC_485	32335	30927	31134	32081	31742		31486	32380	32362	30253	30355	30558	29604	31129	29829	28598	30139	30878	29362	31454	30344	31818	31374	30859	32472	29384	31112	31336	31751	32577	31624	30856
URMC_487	33461	31787	31484	32883	32242	31486		33296	33329	31606	31462	31254	30490	31668	30951	29874	30936	32329	30348	32508	31450	31887	32351	31986	33386	30272	32078	31965	31900	33309	32317	32037
URMC_488	3484	29646	32812	29573	31667	32380	33296		34727	32389	33032	32510	30751	33897	31465	29896	32607	32578	30423	11495	32978	30799	34196	31694	33158	32169	33033	30487	29921	5529	29372	30940
URMC_545	34625	32002	33093	34311	32452	32362	33329	34727		32529	30141	33446	30630	32549	32063	30369	33141	32591	30415	32988	30210	34472	32694	30704	34645	32067	32680	32510	33457	35198	32572	33008
URMC_546	32167	30933	31662	32956	30471	30253	31606	32389	32529		32035	29961	29624	17455	30207	29219	31905	30329	29086	32250	32041	32289	32765	7007	33022	30981	31932	31122	30787	33623	31431	31827
URMC_547	33339	30625	30821	32980	31388	30355	31462	33032	30141	32035		31282	29619	32304	30532	28966	31448	32047	28655	31837	255	33139	30160	29750	32731	31420	30574	31126	30177	32863	30720	31614
URMC_548	32609	30417	30965	32037	32011	30558	31254	32510	33446	29961	31282		29087	29708	14313	28436	31541	31542	28218	30061	31243	32341	32193	28950	32263	26379	31262	30945	30256	33295	30707	31784
URMC_549	31069	30155	30110	31292	29847	29604	30490	30751	30630	29624	29619	29087		30356	29608	28634	29399	29921	28572	30711	29561	31007	30085	29316	31662	28799	29734	29920	30117	30605	30175	30054
URMC_550	33540	31358	32042	33904	31839	31129	31668	33897	32549	17455	32304	29708	30356		31178	29663	31888	31977	29443	32692	32077	32948	33233	18867	33427	30954	32351	32663	31294	33737	31798	32951
URMC_551	31728	30410	29612	31500	30881	29829	30951	31465	32063	30207	30532	14313	29608	31178		28455	30479	30132	28323	31137	30538	31356	30803	30006	32390	23740	30316	30220	29854	31613	30497	30898
URMC_552	30137	29217	28593	30510	29203	28598	29874	29896	30369	29219	28966	28436	28634	29663	28455		28750	29305	28283	29704	29006	29641	29440	28937	30267	28001	29223	28960	29407	30052	28955	29288
URMC_554	33019	30827	30679	33167	31677	30139	30936	32607	33141	31905	31448	31541	29399	31888	30479	28750		32586	29269	31037	31390	32426	31757	29856	32768	30422	30954	31350	30196	32674	30659	32296
URMC_556	32658	31185	32259	33061	30196	30878	32329	32578	32591	30329	32047	31542	29921	31977	30132	29305	32586		29703	32240	32101	32344	32538	29571	33198	31066	31611	31453	31316	34499	32226	30707
URMC_557	30509	29513	28956	30387	29721	29362	30348	30423	30415	29086	28655	28218	28572	29443	28323	28283	29269	29703		29828	28658	30075	29108	29113	30174	27988	29073	29585	29885	30547	29511	28748
URMC_559	12917	29856	31800	29806	32578	31454	32508	11495	32988	32250	31837	30061	30711	32692	31137	29704	31037	32240	29828		31831	30625	32238	31098	33065	31052	31681	31073	28931	12833	28830	31996
URMC_561	33250	30596	30782	32884	31315	30344	31450	32978	30210	32041	255	31243	29561	32077	30538	29006	31390	32101	28658	31831		33202	30099	29491	32696	31087	30546	30925	30216	32961	30889	31509
URMC_562	30996	30064	32463	30826	32214	31818	31887	30799	34472	32289	33139	32341	31007	32948	31356	29641	32426	32344	30075	30625	33202		34445	31095	33465	32183	33201	30810	29418	32508	30403	32886
URMC_563	34436	31701	32279	33590	32935	31374	32351	34196	32694	32765	30160	32193	30085	33233	30803	29440	31757	32538	29108	32238	30099	34445		31045	33253	30955	8866	32092	31756	33860	32101	7186
URMC_564	31286	30607	30472	31284	28864	30859	31986	31694	30704	7007	29750	28950	29316	18867	30006	28937	29856	29571	29113	31098	29491	31095	31045		31469	29149	30262	30347	31043	32226	30760	29989
URMC_565	33485	32122	32004	33364	32861	32472	33386	33158	34645	33022	32731	32263	31662	33427	32390	30267	32768	33198	30174	33065	32696	33465	33253	31469		32138	32976	32204	31645	33445	32289	33029
URMC_566	32450	30389	30221	32762	31550	29384	30272	32169	32067	30981	31420	26379	28799	30954	23740	28001	30422	31066	27988	31052	31087	32183	30955	29149	32138		29964	31092	29728	32428	30593	31038
URMC_567	33036	31249	31722	32930	31733	31112	32078	33033	32680	31932	30574	31262	29734	32351	30316	29223	30954	31611	29073	31681	30546	33201	8866	30262	32976	29964		32092	31271	33215	31940	10898
URMC_569	30519	29525	31379	30508	31244	31336	31965	30487	32510	31122	31126	30945	29920	32663	30220	28960	31350	31453	29585	31073	30925	30810	32092	30347	32204	31092	32092		29481	31918	29658	30914
URMC_570	29885	28219	30613	29639	31308	31751	31900	29921	33457	30787	30177	30256	30117	31294	29854	29407	30196	31316	29885	28931	30216	29418	31756	31043	31645	29728	31271	29481		30244	29116	30875
URMC_571	7464	29687	33229	31523	34208	32577	33309	5529	35198	33623	32863	33295	30605	33737	31613	30052	32674	34499	30547	12833	32961	32508	33860	32226	33445	32428	33215	31918	30244		29795	33341
URMC_572	29223	28972	31126	29857	31639	31624	32317	29372	32572	31431	30720	30707	30175	31798	30497	28955	30659	32226	29511	28830	30889	30403	32101	30760	32289	30593	31940	29658	29116	29795		31566
URMC_573	31303	31464	31221	31945	30090	30856	32037	30940	33008	31827	31614	31784	30054	32951	30898	29288	32296	30707	28748	31996	31509	32886	7186	29989	33029	31038	10898	30914	30875	33341	31566
