# Supplementary material for: Investigation of the Species Distribution of Tissue Invasive Klebsiella Pneumoniae Complex in A New York Hospital System Using Whole Genome Sequencing
Source: Research Square preprint supplement (doi:10.21203/rs.3.rs-151961/v1), 2021-02-03
Supplement: Supplementary file 2 [file a60c229a8dcdd9c8cf1101c3.xls]

## Sheet: Sheet1
Investigation of the Species Distribution of Tissue Invasive Klebsiella pneumoniae Complex in a New York Hospital System Using Whole Genome Sequencing
Running Title: Klebsiella pneumoniae Complex Species
Jessica L. Bohrhunter a , Samantha Taffner a , Jun Wang a , Dwight J. Hardy a, b , Nicole D. Pecora a, b
a Department of Pathology, University of Rochester Medical Center, Rochester, New York, United States of America
b Department of Microbiology and Immunology, University of Rochester, Rochester, New York, United States of America
Correspondence should be directed to Nicole Pecora at Nicole_Pecora@URMC.Rochester.edu

## Sheet: Additional File 4
Additional File 4: Genotypic Antimicrobial Resistance and Virulence Genes of Study isolates
URMC ID	Source	Species	ST Type		Virulence Gene Clusters					Antimicrobial Resistance Genes
				K Locus	Yersiniabactin (ybt)	Colibactin (clb)	Aerobactin (iuc)	Salmochelin (iro)	hypermucoidy (rmpA/rmpA2)	aminoglycoside	fluoroquinalone	chloramphenicol	rifampin	sulfonamide	tetracycline	trimethoprim	beta-lactam
URMC-473	lung	K. pneumoniae	ST15	#	-	-	-	-	-	-	-	-	-	-	tetD	-	BlaSHV-28*
URMC-475	liver	K. pneumoniae	ST23	KL1	-	-	present	present	present	-	-	-	-	-	-	-	BlaSHV-190*
URMC-482	sterile body fluid	K. pneumoniae	ST678-1LV	#	-	-	-	-	-	-	-	-	-	-	-	-	BlaSHV-41
URMC-483	joint	K. pneumoniae	ST870	KL17	-	-	-	-	-	-	-	-	-	-	-	-	-
URMC-484	sterile body fluid	K. pneumoniae	ST45	#	present	-	-	-	-	-	-	-	-	-	tetD	-	BlaSHV-26*
URMC-485	kidney	K. pneumoniae	ST25	KL2	present	-	-	-	-	-	-	-	-	-	-	-	BlaSHV-77*
URMC-487	kidney	K. pneumoniae	ST252	#	-	-	-	-	-	-	-	-	-	-	-	-	BlaSHV-1?
URMC-488	pleural fluid	K. pneumoniae	ST14	#	-	-	-	-	-	aadA1-pm*?	-	-	-	sulI	tetD	dfrA1*	-
URMC-545	abdominal fluid	K. pneumoniae	ST392	#	-	-	-	-	-	-	qnrB1?, parC-80I, gyrA-83I	-	-	-	tetA?	dfrA14	BlaSHV-67*?, blaCTX-M-15
URMC-546	kidney	K. pneumoniae	ST37-1LV	#	-	-	-	-	-	-	-	-	-	-	-	-	BlaSHV-187*
URMC-547	CSF	K. pneumoniae	ST307	#	-	-	-	-	-	strB, strA*, aac3-IIa*	parC-80I, gyrA-83I	-	-	sulII	-	dfrA14	BlaSHV-28*, blaCTX-M-15, BlaTEM-30*
URMC-548	abdominal fluid	K. pneumoniae	ST18	#	-	-	-	-	-	-	gyrA-87N	-	-	-	-	-	BlaSHV-187*
URMC-549	liver	K. pneumoniae	ST373	KL2	present	-	present	present	present	-	-	-	-	-	-	-	BlaSHV-187*
URMC-550	muscle	K. pneumoniae	ST37	#	-	-	-	-	-	-	-	-	-	-	-	-	BlaSHV-77*
URMC-551	bone	K. pneumoniae	ST20	#	-	-	-	-	-	-	-	-	-	-	-	-	BlaSHV-187
URMC-552	spine	K. pneumoniae	ST234	KL30	present	present	-	-	-	-	-	-	-	-	-	-	BlaSHV-27
URMC-553	joint fluid	K. variicola	ST729-4LV	KL6	-	-	-	-	-	-	-	-	-	-	-	-	BlaLEN-24*
URMC-554	bone	K. pneumoniae	ST1800-1LV	KL17	present	-	-	-	-	-	-	-	-	-	-	-	BlaSHV-187*
URMC-555	liver	K. quasipneumoniae	ST414	KL123	-	-	-	-	-	AadA16*;StrB*;StrA*	qnrB17*, qnr-S1	catA2*	arr3	sulI, sulII	tetA*	dfrA27	BlaOKB-8, blaCTX-M-15
URMC-556	abdominal fluid	K. pneumoniae	ST54	#	-	-	-	-	-	-	-	catA1*	-	-	tetD	-	BlaSHV-36*, BlaTEM-30*
URMC-557	ascites fluid	K. pneumoniae	ST692-1LV	KL48	-	-	-	-	-	-	-	-	-	-	-	-	BlaSHV-187*
URMC-559	abdominal fluid	K. pneumoniae	ST15	KL24	-	-	-	-	-	-	-	-	-	-	-	-	BlaSHV-28*
URMC-560	liver	K. quasipneumoniae	ST1584	KL81	-	-	-	-	-	aadA1-pm*?	-	-	-	sulI	-	-	BlaOKB-10*
URMC-561	bone	K. pneumoniae	ST307	#	-	-	-	-	-	strB, strA*, aac3-IIa*	parC-80I, qyrA-83I	catB4	-	sulII	-	dfrA14	BlaSHV-28*, BlaOXA-1, blaCTX-M-15
URMC-562	tissue	K. pneumoniae	ST1520-1LV	#	-	-	-	-	-	-	-	-	-	-	-	-	BlaSHV-187*
URMC-563	lung	K. pneumoniae	ST36	#	-	-	-	-	-	-	-	-	-	-	-	-	BlaSHV-13*
URMC-564	abdominal fluid	K. pneumoniae	ST37	#	-	-	-	-	-	-	-	-	-	-	-	-	BlaSHV-187*
URMC-565	sterile body fluid	K. pneumoniae	ST664	KL62	-	-	-	-	-	-	-	-	-	-	-	-	BlaSHV-187*
URMC-566	abdominal fluid	K. pneumoniae	ST1380-1LV	#	-	-	-	-	-	-	-	-	-	-	-	-	BlaSHV-26
URMC-567	liver	K. pneumoniae	ST36	KL27	-	-	-	-	-	-	-	-	-	-	-	-	-
URMC-569	sterile body fluid	K. pneumoniae	ST321	#	-	-	-	-	-	-	-	-	-	-	-	-	BlaSHV-187*
URMC-570	ascites fluid	K. pneumoniae	ST364-2LV	#	-	-	-	-	-	strB	-	-	-	sulII	-	dfrA14*	BlaSHV-28*
URMC-571	ascites fluid	K. pneumoniae	ST14	#	present	-	-	-	-	-	-	-	-	-	tetD	-	BlaSHV-1?
URMC-572	ascites fluid	K. pneumoniae	ST247	KL10	-	-	-	-	-	-	-	-	-	-	-	-	BlaSHV-187*
URMC-573	liver	K. pneumoniae	ST268	#	present	-	-	-	-	-	-	-	-	-	tetD	-	BlaSHV-13*
URMC-575	liver	K. pneumoniae	ST111	KL63	present	-	-	-	-	-	-	-	-	-	-	-	BlaSHV-187*
URMC-591	liver	K. pneumoniae	ST23	KL1	present	present	present	present	present	-	-	-	-	-	-	-	BlaSHV-190*
URMC-592	liver	K. pneumoniae	ST70	#	-	-	-	-	-	-	-	-	-	-	-	-	BlaSHV-32
URMC-593	liver	K. pneumoniae	ST461	KL2	-	-	-	-	-	-	-	-	-	-	-	-	BlaSHV-187*
URMC-594	liver	K. pneumoniae	ST86-1LV	KL2	-	-	present	present	present	-	-	-	-	-	-	-	BlaSHV-187*
URMC-595	liver	K. pneumoniae	ST23	KL1	present	present	present	present	present	-	-	-	-	-	-	-	BlaSHV-190*
URMC-596	liver	K. pneumoniae	ST45	#	present	-	-	-	-	strB, strA	-	-	-	-	-	-	BlaSHV-26*
URMC-597	liver	K. pneumoniae	ST466	#	present	-	-	-	-	-	-	-	-	-	-	-	BlaSHV-33
URMC-598	liver	K. pneumoniae	ST483	#	-	-	-	-	-	-	-	-	-	-	-	-	BlaSHV-27
URMC-599	liver	K. pneumoniae	ST252	KL81	-	-	-	-	-	-	-	-	-	-	-	-	BlaSHV-1?
URMC-600	liver	K. pneumoniae	ST322	KL17	-	-	-	-	-	-	-	-	-	-	-	-	BlaSHV-187*
URMC-603	liver	K. variicola	ST347-1LV	#	-	-	-	-	-	-	-	-	-	-	-	-	BlaLEN-24*
* No exact nucleotide or amino acid sequence match found, allele represents the closest available nucleotide match.
? Exact nucleotide match is less than half the reported length of the allele.
# no high confidence match to known capsule types was found
